# Supplementary material for: Areas of enduring COVID-19 prevalence: drivers of prevalence and mitigating strategies.
Source: Research Square preprint supplement (doi:10.21203/rs.3.rs-2129271/v1), 2022-11-03
Supplement: Supplementary file 1 [file 1a00558e36f5b641dcaed7d7.docx]

Appendix: Semi-structured interview schedule

Can you please tell me a little about your current role and the local authority in which you work? How would you describe the changes in COVID-19 prevalence in your LA over the course of the pandemic?

1. In your opinion, what are the main factors that contribute to differences in the prevalence of COVID between locations/places?
2. Why do you think certain areas have sustained high levels of prevalence?
3. Has the importance/role of these factors changed throughout the timeline of the pandemic? If so, how?
4. How effective do you think national level strategies, policies and guidance are in reducing transmission?
5. Can you tell us about local/regional strategies that have been effective in helping reduce COVID-19 infection rates?
6. How have you identified any particular population groups for tailored interventions?
7. How has the response to COVID-19 been organised locally?
8. How have LAs been sharing information and learning?
9. What data, evidence and knowledge are used to inform local decision making?
10. What future research do you think would be most useful to provide insights that can support LA practice and decision making?
11. In your opinion, what are the future challenges for preventing or reducing local / regional enduring COVID-19 prevalence?
12. Are there any other stakeholders you would recommend us contacting to gain a better understanding of disparities in prevalence of covid-19 infection? (names / locations / roles)

Finally, is there anything you thought we might discuss, that we have not covered?
